# Supplementary material for: Phosphatase-responsive amphiphilic calixarene assembly
Source: Royal Society of Chemistry journal article supplement (doi:10.1039/c3ra40453f), 2013-01-01
Supplement: c3ra40453f.pdf [file c3ra40453f.pdf]

Supporting Information for

## **Phosphatase-Responsive Amphiphilic Calixarene Assembly**

Yi-Xuan Wang, Dong-Sheng Guo, Yu Cao, and Yu Liu\*

*Department of Chemistry, State Key Laboratory of Elemento-Organic Chemistry,*

*Nankai University, Tianjin, 300071, P. R. China*

*E-mail: yuliu@nankai.edu.cn   Fax: (+86)22-2350-3625*

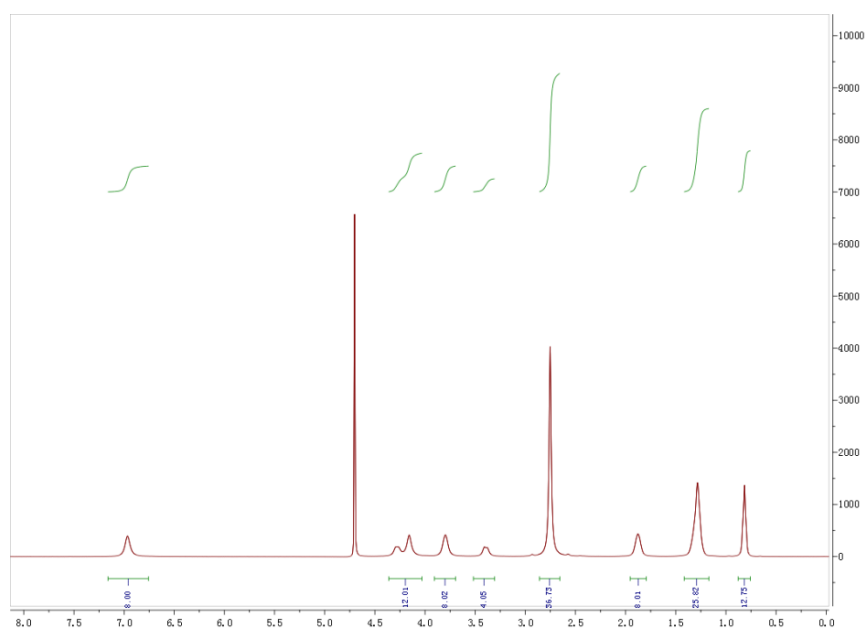

**Figure S1.**  $^1\text{H}$  NMR spectrum (400 MHz,  $\text{D}_2\text{O}$ , 298.15K) of AC4AH.

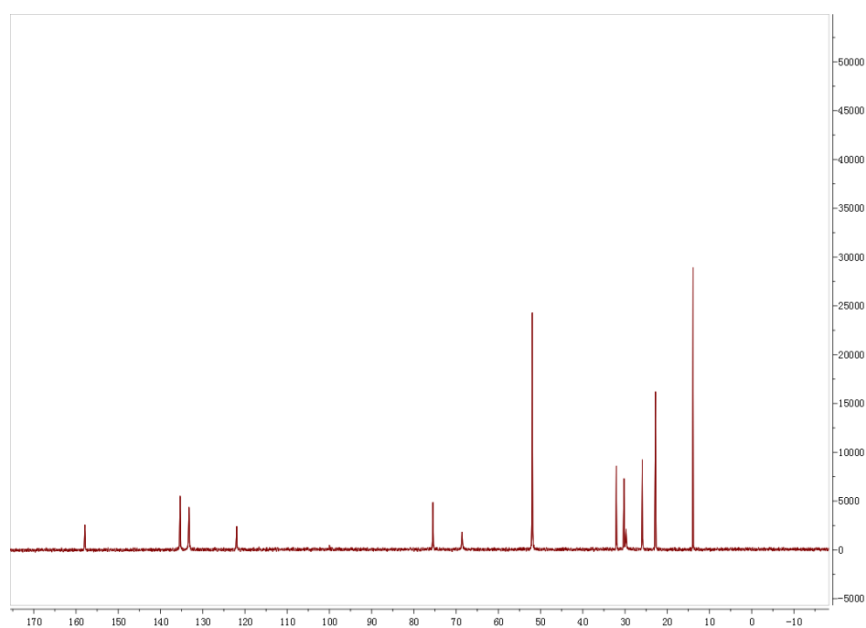

**Figure S2.**  $^{13}\text{C}$  NMR spectrum (400 MHz,  $\text{D}_2\text{O}$ , 298.15K) of AC4AH.

**CAC of AC4AH.** Vibronic band intensities in pyrene monomer fluorescence are a convenient probe to accurately determine CAC values. As shown in Figure S3, the ratio (band III:bandI) increased in the presence of AC4AH, indicating that AC4AHs constitute micellelike aggregates presenting hydrophobic domains formed by alkyl chains that serve as a binding site for pyrene molecules. The CAC is approximated to

be 0.6 mM.<sup>1</sup>

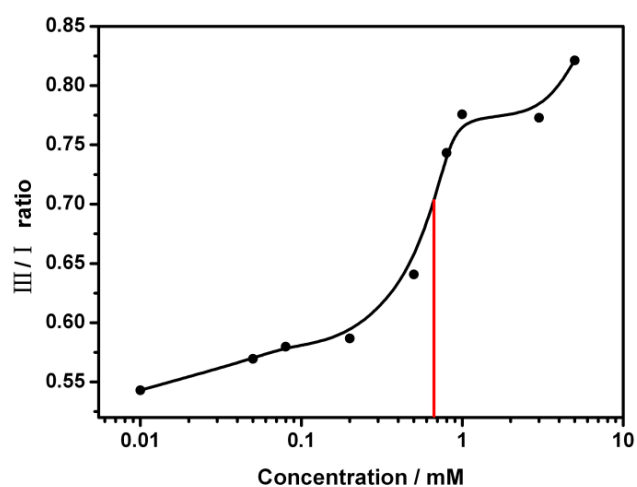

**Figure S3.** Plots of bands III:I ratio versus [AC4AH] in pyrene fluorescence at 25 °C:  
[pyrene] = 0.001 mM, excitation 335 nm.

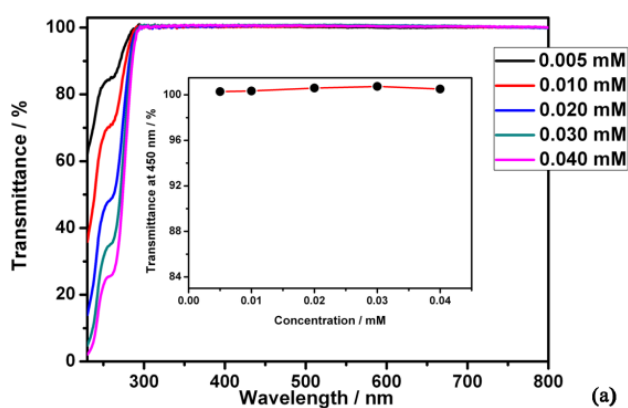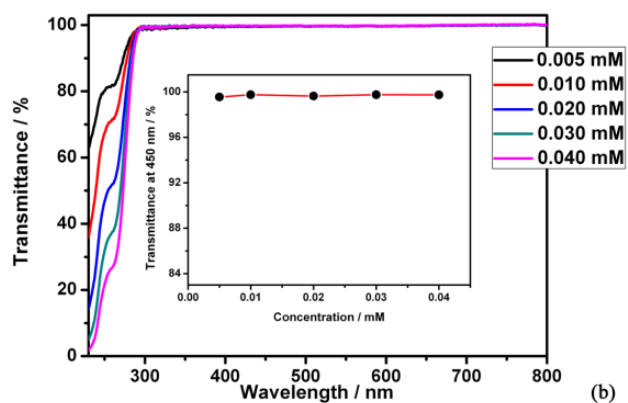

**Figure S4.** (a) Optical transmittance of AC4AH–ADP complex at different concentrations at 25 °C. Inset: dependence of the optical transmittance at 450 nm on ADP concentration. (b) Optical transmittance of AC4AH–AMP complex. Inset: dependence of the optical transmittance at 450 nm on AMP concentration.

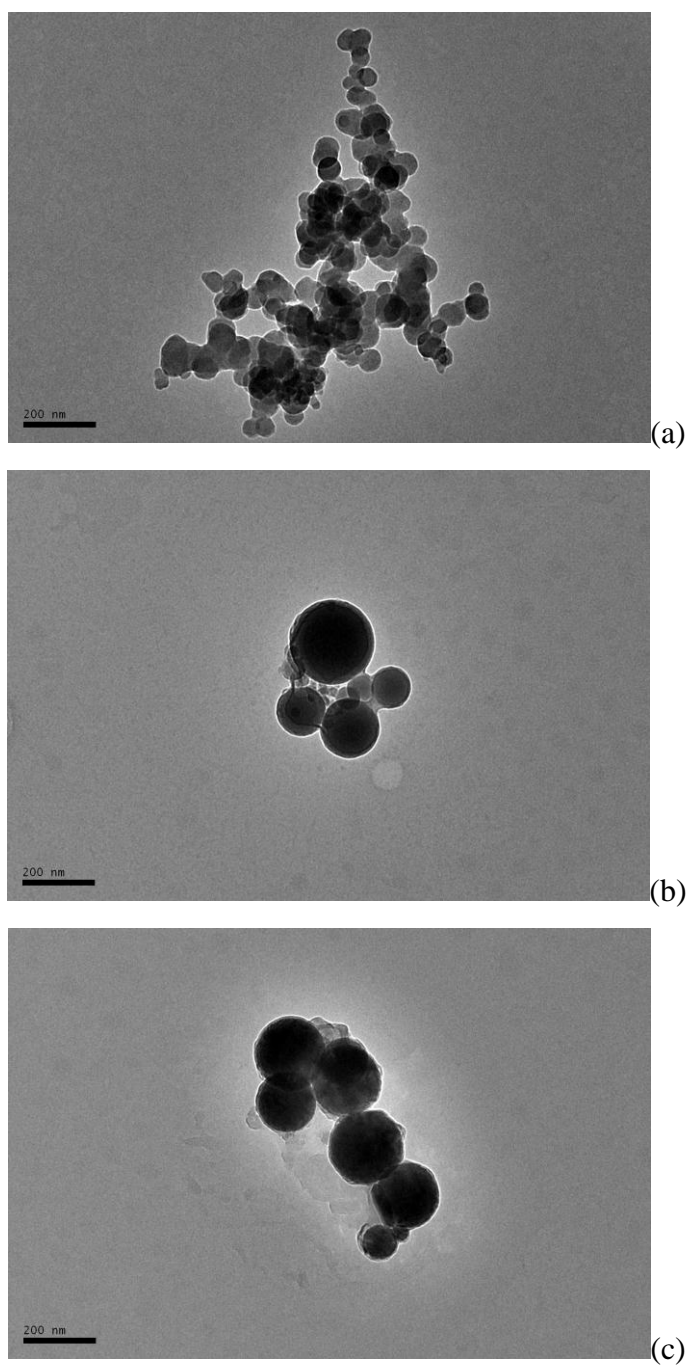

**Figure S5.** High-resolution TEM images of AC4AH–ATP particles.

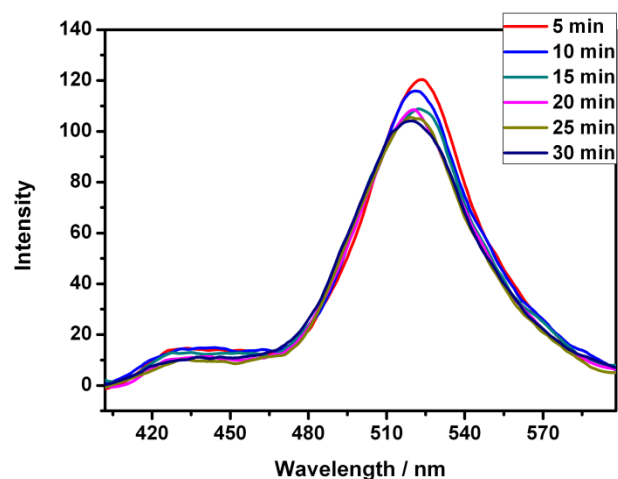

(a)

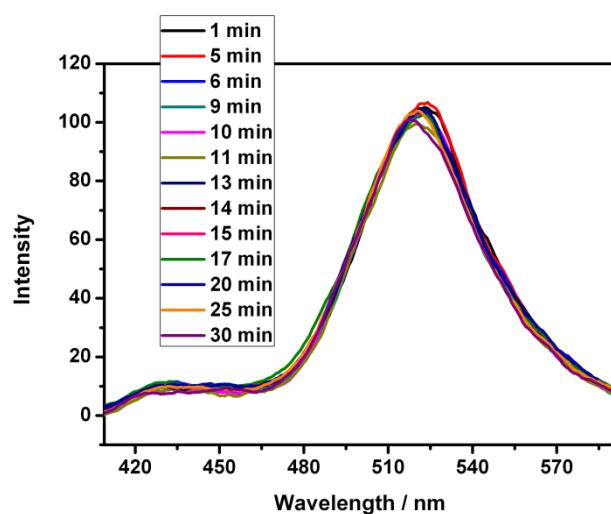

(b)

**Figure S6.** Fluorescence emission spectra of HPTS with AC4AH-ATP complex in the absence of CIAP (a) and in the presence of denatured CIAP (b) at different time within 30 minutes.

## References

- [1] S. Shinkai, S. Mori, H. Koreishi, T. Tsubaki and O. Manabe, *J. Am. Chem. Soc.*, 1986, **108**, 2409.
